# Supplementary material for: In Situ Monitoring of the Effect of Ultrasound on the Sulfhydryl Groups and Disulfide Bonds of Wheat Gluten
Source: PubMed Central journal article supplement (PMC6100594; doi:10.3390/molecules23061376), 2018-06-07
Supplement: molecules-23-01376-s001.pdf [file molecules-23-01376-s001.pdf]

## Supplementary data

Tab.1 Best results from different spectral processing method for the PLS models of SH and SS contents

| Parameters                  | Pretreated method   | $PC_s$ | $R_c$  | $RMSEC$ | $R_p$  | $RMSEP$ |
|-----------------------------|---------------------|--------|--------|---------|--------|---------|
| SH<br>( $\mu\text{mol/g}$ ) | SNV                 | 8      | 0.8882 | 0.48    | 0.8392 | 0.61    |
|                             | MSC                 | 8      | 0.8884 | 0.49    | 0.8385 | 0.61    |
|                             | 1 <sup>st</sup> Der | 10     | 0.8013 | 0.55    | 0.7855 | 0.78    |
|                             | 2 <sup>nd</sup> Der | 9      | 0.8124 | 0.64    | 0.7756 | 0.74    |
| SS<br>( $\mu\text{mol/g}$ ) | SNV                 | 4      | 0.6322 | 7.41    | 0.5814 | 9.66    |
|                             | MSC                 | 4      | 0.6312 | 7.45    | 0.5634 | 9.60    |
|                             | 1 <sup>st</sup> Der | 5      | 0.6055 | 7.65    | 0.5044 | 9.89    |
|                             | 2 <sup>nd</sup> Der | 5      | 0.6123 | 7.44    | 0.5146 | 8.78    |
